# Supplementary material for: Highly selective and sensitive probes for the detection of Cr(vi) in aqueous solutions using diglycolic acid-functionalized Au nanoparticles
Source: Royal Society of Chemistry journal article supplement (doi:10.1039/c9ra00010k), 2019-01-01
Supplement: c9ra00010k1.pdf [file c9ra00010k1.pdf]

Supplementary information of

**Highly selective and sensitive probes for the detection of Cr(VI) in aqueous solutions using diglycolamic acid functionalized Au nanoparticles**

Authors: Yang Zhang<sup>1,2,\*</sup>, Ruixi Bai<sup>1,2</sup>, Zhigang Zhao<sup>1,2</sup>, Qiuxia Liao<sup>1,2</sup>, Peng Chen<sup>1,2</sup>, Wanghuan Guo<sup>1,2</sup>, Chunqing Cai<sup>1,2</sup>, and Fan Yang<sup>1,2,\*</sup>

<sup>1</sup>CAS Key Laboratory of Design and Assembly of Functional Nanostructures and Fujian Provincial Key Laboratory of Nanomaterials, Fujian Institute of Research on the Structure of Matter, Chinese Academy of Sciences

<sup>2</sup>Xiamen Institute of Rare Earth Materials, Haixi Institute, Chinese Academy of Sciences, Xiamen 361021

\* Corresponding author

Dr. Yang Zhang

E-mail: [yzhang@fjirsm.ac.cn](mailto:yzhang@fjirsm.ac.cn);

Prof. Fan Yang

E-mail: [fanyang2013@fjirsm.ac.cn](mailto:fanyang2013@fjirsm.ac.cn);

## Synthesis approach

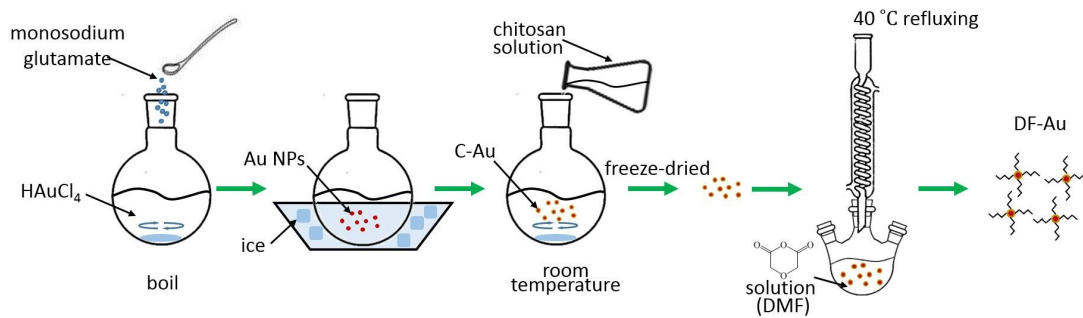

## The chemical structure change

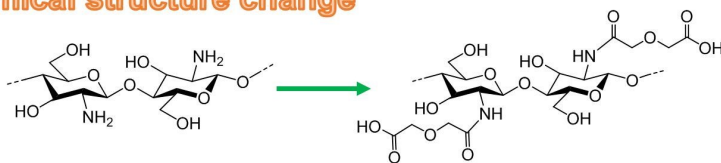

Scheme S1. The flow chart of the synthesis process of the DF-Au sensors.
